# Supplementary material for: Expression of SARS-CoV-2 entry molecules ACE2, NRP1, TMPRSS2, and FURIN in the reproductive tissues of male macaques
Source: Research Square preprint supplement (doi:10.21203/rs.3.rs-3439897/v1), 2023-10-17
Supplement: Supplementary file 1 [file 7a095ce1ca31aed0d95a6d5c.xlsx]

## Sheet: Sheet1
Table 2. Information of primary antibodies for immunohistochemistry.
Antibody	Host	Type	Dilution	Source
anti-ACE2	Gt	Poly	1:200	R&D systems, MN, USA
anti-NRP1	Rb	Poly	1:50	Merck, Darmstadt, DE
anti-TMPRSS2	Rb	Mono	1:50	Abcam, Cambridge, UK
anti-FURIN	Rb	Poly	1:200	Proteintech, IL, USA
anti-FURIN	Ms	Mono	1:200	Proteintech
anti-DAZL	Ms	Mono	1:200	Santa Cruz Biotechnology, CA, USA
anti-DDX4	Rb	Poly	1:100	LifeSpan BioSciences, WA, USA
anti-SOX9	Ms	Mono	1:200	Sigma-Aldrich, MO, USA
Abbriviations: Gt, goat; Ms, mouse; Rb, rabbit; Poly, polyclonal; Mono, monoclonal
