# Supplementary material for: Expression of SARS-CoV-2 entry molecules ACE2, NRP1, TMPRSS2, and FURIN in the reproductive tissues of male macaques
Source: Research Square preprint supplement (doi:10.21203/rs.3.rs-3439897/v1), 2023-10-17
Supplement: Supplementary file 2 [file d12c4c06a0be73d1cd7379fc.xlsx]

## Sheet: Sheet1
Table 1. List of primer sequences for RT-PCR
Gene	Forward primer	Reverse primer
Ace2	5’-GGACCCAGGAAATGTTCAGA-3’	5’-GGCTGCAGAAAGTGACATGA-3’
Nrp1	5’-CTGGTGAGCCCTGTGGTTTATTCC-3’	5’-ACTAATGTCATCCACAGCAATCCC-3’
Tmprss2	5’-AAGAAAGCACTGTGCGTCACCA-3’	5’-TGAGGAGTCGCACTCTATCCCA-3’
Furin	5’-AGCTGAGGTCCTGGTTGCTATG-3’	5’-ATCAGCTGCTAGCAGGACCAAG-3’
Gapdh	5’-ACAACTTTGGCATTGTGGAA-3’	5’-GATGCAGGGATGATGTTCTG-3’
